# Supplementary material for: USP7 targeting modulates anti-tumor immune response by reprogramming Tumor-associated Macrophages in Lung Cancer
Source: PubMed Central journal article supplement (PMC7415808; doi:10.7150/thno.47137), 2020-07-23
Supplement: thnov10p9332s1.pdf [file thnov10p9332s1.pdf]

# **USP7 targeting modulates anti-tumor immune response by reprogramming tumor-associated macrophages in lung cancer**

*Xiaomeng Dai<sup>†1</sup>, Lisen Lu<sup>†1</sup>, Suke Deng<sup>†</sup>, Jingshu Meng<sup>†</sup>, Chao Wan<sup>†</sup>, Jing Huang<sup>†</sup>, Yajie Sun<sup>†</sup>, Yan Hu<sup>†</sup>, Bian Wu<sup>†</sup>, Gang Wu<sup>†</sup>, Jonathan F. Lovell<sup>‡</sup>, Honglin Jin<sup>†\*</sup>, Kunyu Yang<sup>†\*</sup>*

<sup>†</sup>Cancer Center, Union Hospital, Tongji Medical College, Huazhong University of Science and Technology, Wuhan 430022, China

<sup>‡</sup>Department of Biomedical Engineering, University at Buffalo, State University of New York. Buffalo, New York 14260, USA

<sup>1</sup>These authors contributed equally to this work.

\*Correspondence: Cancer Center, Union Hospital, Tongji Medical College, Huazhong University of Science and Technology, Wuhan 430022, China. Fax: +86-27-65650733; Tel: +86-27-85873100.

Email: Kunyu Yang, yangkunya@medmail.com.cn; Honglin Jin, jin@hust.edu.cn

**Supplementary Table S1. RT-PCR primer information**

| Gene   | Forward (5' to 3')      | Reverse (5' to 3')       |
|--------|-------------------------|--------------------------|
| USP1   | AGATGTGTGAACTAGGTAAGCC  | ATACTTCATCGTCGTAGTTCCC   |
| USP3   | GTTTGCTCCTTAAGAGATTGCC  | TTCAGTGGGAATTGAACGTAT    |
| USP4   | CAGGCAACAAAGAAGTTTGACT  | CCGCCAGTATCTGTTATAGGAG   |
| USP5   | GAAAGCTGTGTACTATACGGGA  | GGGTTTGCAAATCTGGATCAT    |
| USP7   | TCGTTCGCACATTGAGACGG    | CTTGTCGGCATGGTTGGGAAT    |
| USP8   | GGACCCTTGGTCATCGACAG    | CACCAGCTTTGAACAGCAGATA   |
| USP9x  | TCCAACAGAATCAGACTTCATCG | TGGAAATGCAGGTTCCCTCATCT  |
| USP10  | CTGAAGCCGTTGAAAAAGATGAG | TCAGCCTCTGCGTTAGAGTTG    |
| USP11  | GCAGAACCATAAACGACGAAAT  | CACAGATCTGAGATATTGCCCT   |
| USP12  | CAGTCTCCAAATTCGCCTCCA   | GTGCTCGTTGACCGGAACT      |
| USP13  | CAGTCTGCCCTTGGCATTAC    | CCTCTTCTCTTAGGGAGCACAG   |
| USP14  | ACCTCCAATGGTGTTCAAAGC   | CATCCTTCAGGGTTCCTCCTT    |
| USP15  | TCAGCCATTCAGTGTGTTGAGC  | TTTCACCTCTCATTCCCTAAGGGA |
| USP16  | TGGCTCCTTTTTGTACCCTTAA  | GTACCACTGTGTTCAACAACCTC  |
| USP18  | CAGGAGTCCCTGATTTGCGTG   | CAGAGGCTTTGCGTCCTTATC    |
| USP19  | TGGAGATGCTAGGAGAGTGTC   | CGCAGCTTAACAATCACCTCAT   |
| USP20  | TGGACTGCATAGGGGAGGTG    | GGCAAGCCCATAGGTTAGGTC    |
| USP21  | AACTCCATGTTACGACCTTTCG  | AAGGGGACCTCTAGGACGAGA    |
| USP22  | TCTTTCTGTCGGATAGGCACC   | GCCCTGAGTAAAACCTCCTGGA   |
| USP24  | GCTGGAAAGCCGCGTTTTG     | CAAGTCTGGCTAAGTAGGTGGA   |
| USP25  | TCTCGAAACCCCTATGACAGAA  | TGAATAACTGCACTAAACCAGCA  |
| USP27x | GACATTGAGCAAATTGCCAAAGA | AAGTCCCGGCACTGAACAC      |
| USP28  | GGGTCCGAGAAGGAAAGCC     | CACGGAACGATCCGAAGGAAG    |
| USP29  | GCTGGGTGATAATGTTACAGGC  | TGAGTAAGGATGTGTGCTCTCT   |
| USP30  | CCTCACCCACGACCAATC      | GAGAAAGGCTGTCAAAGGTGT    |
| USP31  | TTCTTTGCCAATTCCTCTACCC  | CACAGCCACACCGATCCTC      |
| USP32  | GTCCCAGATACACTCAGGAAGT  | AGCGAGAGAAGGTAAAAGCATC   |
| USP33  | GGACCACAGCACCATACTACTC  | GCTGCAAGCATAACACCATACT   |
| USP34  | CTGGTTGCCTATGAAGGCTTG   | AGCTTGATGCAGTTTTTCGACA   |
| USP36  | CCAACAGCGGCAATGCTATC    | CATCGCATCAATGGTGTACCG    |
| USP37  | AGTCAGCCTGCTCGTTCACTA   | AAGTCAACATTAGGCGGCTTT    |
| USP38  | GCCCCTCAAGCGGATGATT     | GGGTCGTCAGGTCAAACATGG    |
| USP39  | GTCCTGCCCCGTACTTGGATA   | GTATGCGTTGATGTGCGAGAG    |
| USP40  | TGACCGACTGGTTAAAGCAGC   | GCTAGTATCCTTGTAGCGTTCAC  |
| USP42  | AGGCGGTCTCACCTGAAGA     | CACTGGCCCTAATGGAAGTGT    |
| USP45  | ATGCGGGTAAAAGATCCATCAA  | ACGTTAGACCTACAGCAATGTCA  |
| USP46  | ATGACTGTCCGAAACATCGCC   | TTGACCAATCCGAAGTAGTGTT   |
| USP47  | GATGTGATTCCCTTGGATTGCT  | AACCCCATGGTGTATCTTCTTC   |
| USP48  | CAGAGGAAACCCGAATTGCTT   | GTGGCTCCCAGGTTAGTCAAG    |
| USP49  | AGTTCCGGGAATGTTTCCTGA   | CTCCTTACTGACAACTCTGCG    |
| BAP1   | TGGGTCTGCCTATTGGCTTCT   | AGCCCACTCAATGGTTTTCTTTT  |
| UCHL3  | TCAAGGACAAGATGTGACATCA  | TTCGAAGTGCATCTTGTCTTTG   |

|               |                          |                           |
|---------------|--------------------------|---------------------------|
| UCHL5         | AGTGTACTACTGAACTGTACGCA  | CACTTGTCGAATCACATCTGAGT   |
| OTUB1         | TGATGGCAACTGCTTCTACCG    | GTCCTCTTTACTCTTGGCAGAC    |
| OTUB2         | AACTCAGCAAAAGATTCACCTCG  | TCATTTGGGGTCTGTAGCACA     |
| OTUD7B        | TGCTGTCCTGTCGGATTTTGT    | TGGACTTGACGCAACTGTTCA     |
| OTUD1         | AGAGGCAGGACAAGTACCTGA    | CCCGTACACAGTCTTGCTGAC     |
| OTUD3         | CTTCGTGGAAGATGACATTCCC   | AAAGGGGCATTAAGCTGATGG     |
| OTUD5         | AGGACGGTGCCTGTCTATTTTC   | CATCAGATAGTCCATGCAATGCT   |
| CYLD          | ACCCTACTGGGAAGAACGGAT    | CGGTCTTGGATGTACTGTCCTAT   |
| ZRANB1        | CCAGACTCTAGTGCAAGACCA    | GGTCCTACGCTGGGATAAGC      |
| Arg1          | GGTTCTGGGAGGCCTATCTT     | CACCTCCTCTGCTGTCTTCC      |
| Chi3          | CCCTGGGTCTCGAGGAAGCCC    | GCAGCCTTGGAATGTCTTTCTCCAC |
| IFN- $\gamma$ | GAGCCAGATTATCTCTTTCTACCT | GTTGTTGACCTCAAACCTTGGC    |
| IL-1          | ACCCCAAAGATGAAGGGCTG     | TACTGCCTGCCTGAAGCTCT      |
| IL-10         | CAGAGAAGCATGGCCCAGA      | TGCTCCACTGCCTTGCTCTTA     |
| IL-12p35      | GGAACTACACAAGAACGAGAG    | AAGTCCTCATAGATGCTACCA     |
| IL-12p40      | TGGTTTGCCATCGTTTTGCTG    | ACAGGTGAGGTTCACTGTTTCT    |
| IL-6          | GAGGATACTCCCAACAGACC     | AAGTGCATCATCGTTGTTTCATACA |
| TNF- $\alpha$ | CATCTTCTCAAATTCGAGTGACAA | TGGGAGTAGACAAGGTACAACCC   |
| VEGF          | AAAAACGAAAGCGCAAGAAA     | TTTCTCCGCTCTGAACAAGG      |
| Nos2          | CACCAAGCTGAACTTGAGCG     | CCATAGGAAAAGACTGCACCG     |

**Supplementary Table S2. The antibodies information**

| <b>Antibody</b> | <b>Catalog number</b> | <b>Company</b>            |
|-----------------|-----------------------|---------------------------|
| USP7            | #4833                 | Cell Signaling Technology |
| JNK             | #9252                 | Cell Signaling Technology |
| p-JNK           | #4668                 | Cell Signaling Technology |
| ERK1/2          | #4695                 | Cell Signaling Technology |
| p-ERK1/2        | #4370                 | Cell Signaling Technology |
| P38             | #8690                 | Cell Signaling Technology |
| p-p38           | #4511                 | Cell Signaling Technology |
| $\beta$ -actin  | GB11001               | Servicebio                |
| GAPDH           | GB11002               | Servicebio                |
| PD-L1           | 17952-1-AP            | Proteintech               |

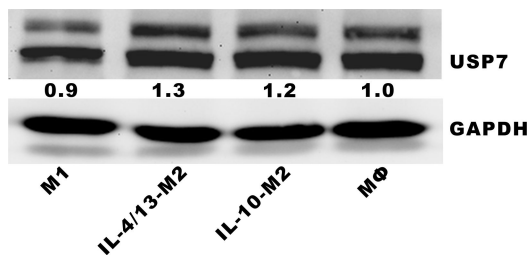

**Figure S1.** Western blotting showing the expression of USP7 in MΦ, M1, and M2 induced from ANA-1.

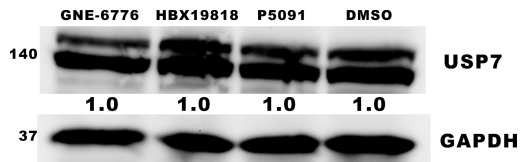

**Figure S2.** Western blotting showing the expression of USP7 in ANA-1 from various indicated treatments.

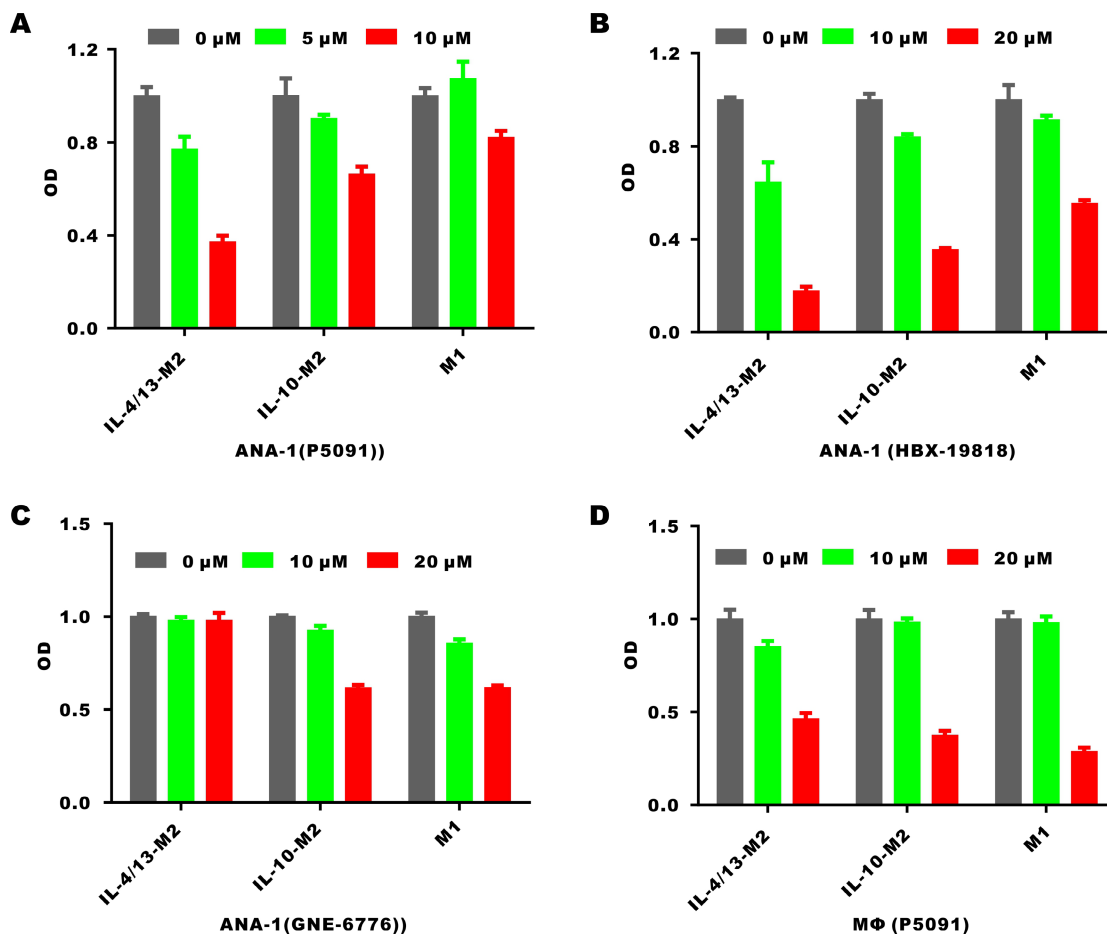

**Figure S3.** Cell viability detected by CCK-8 of M1 and M2 in the presence of USP7 inhibitors using indicated concentrations. (A-C) Effects of USP7 inhibitor P5091 (A), HBX19818 (B), and GNE-6776 (C) on the viability of M1, IL-4/13 M2, and IL-10 M2 induced from ANA-1. (D) Detection of the effect of P5091 on the viability of M1, IL-4/13 M2, and IL-10 M2 induced by BMDMs. Data are presented as the mean  $\pm$  SEM (n = 3) for (A-D).

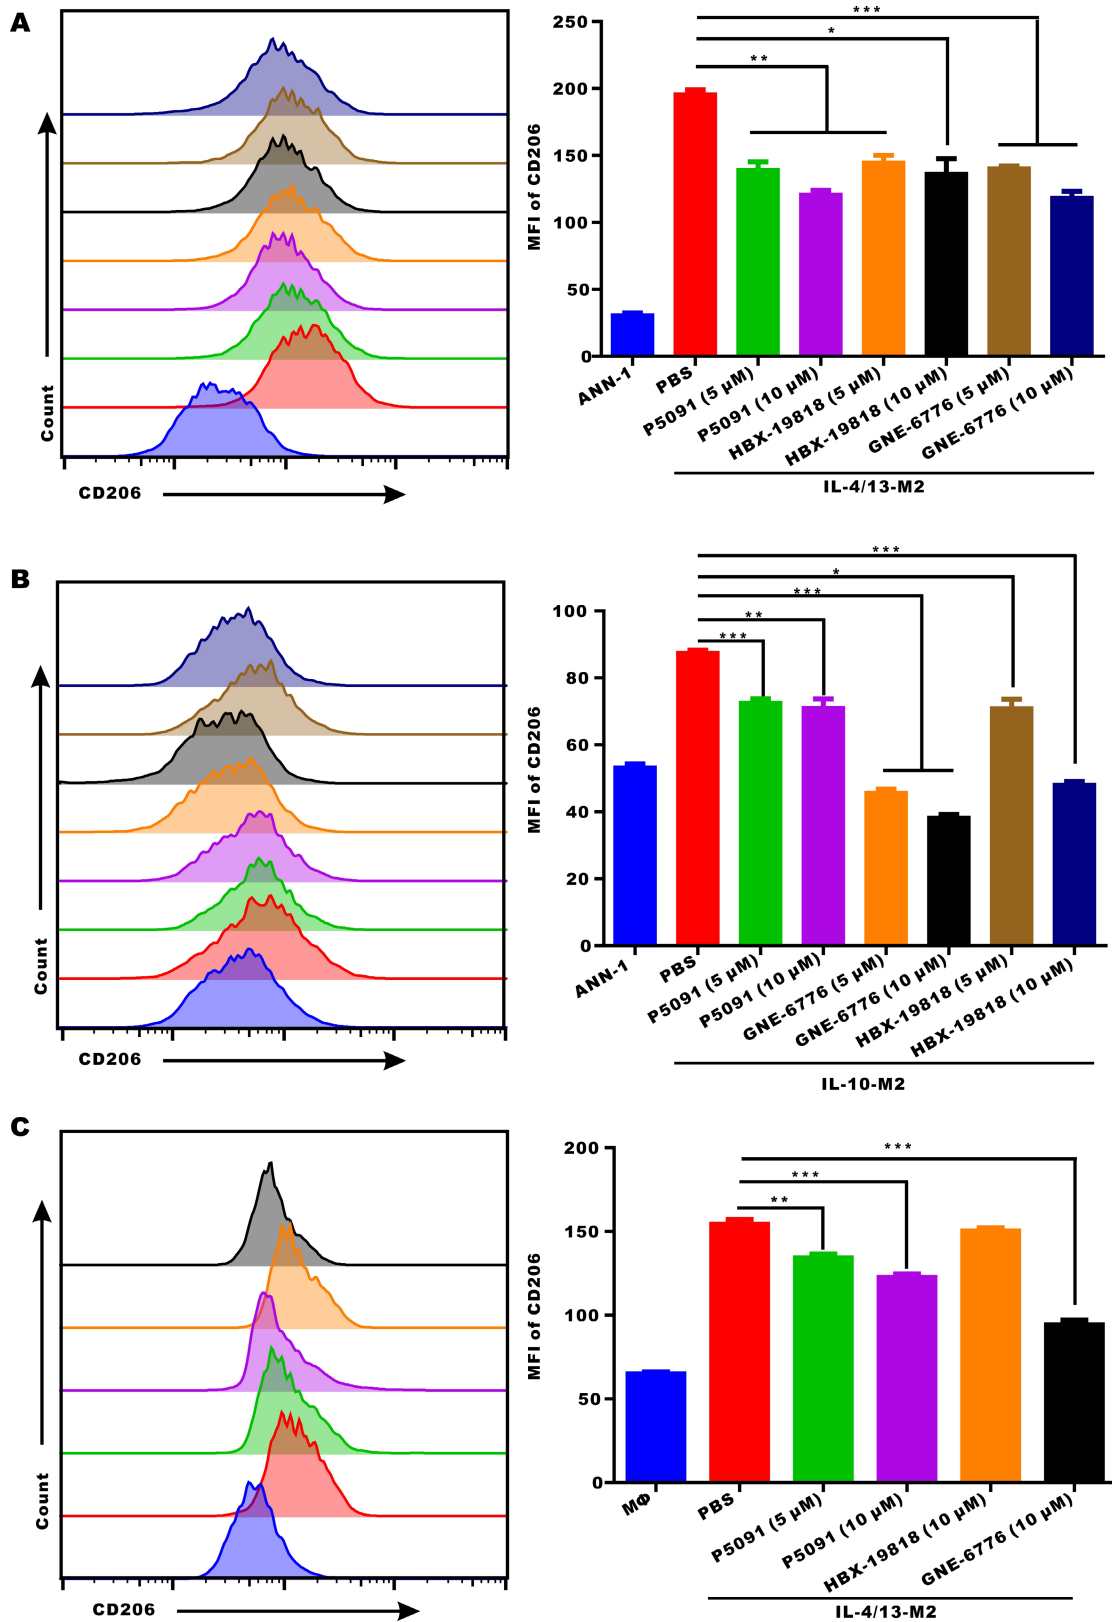

**Figure S4. Flow cytometry analyses of the expression of CD206 in M2 M $\Phi$ s in the presence of USP7 inhibitors or PBS. (A-B) Detection of the expression of CD206 in IL-4/13-M2 (A) and IL-10 M2 (B) induced from ANA-1 with indicated various USP7 inhibitors or PBS. (C) CD206 expression in IL-4/13-BMDM M2 treated with indicated various USP7 inhibitors or PBS was analyzed by flow cytometry. Data are presented as the**

mean  $\pm$  SEM (n = 3) for (A-C).

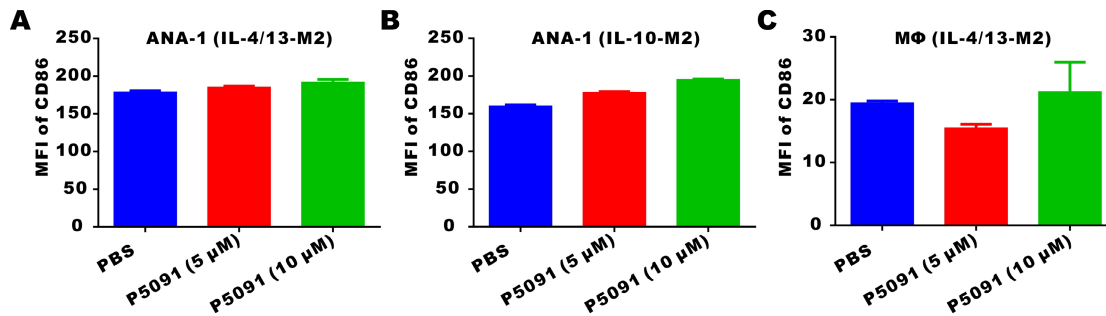

**Figure S5. Detection of the expression of CD86 in M2 MΦs in the presence of P5091 or PBS by flow cytometry.** (A-B) The expression of CD86 in IL-4/13 M2 (A) and IL-10 M2 (B) induced from ANA-1 was analyzed by flow cytometry in the presence of P5091 (5  $\mu$ M and 10  $\mu$ M) or PBS. (C) Quantification of CD86 in IL-4/13-BMDM M2 treated with indicated various treatments by flow cytometry. Data are presented as the mean  $\pm$  SEM (n = 3) for (A-C).

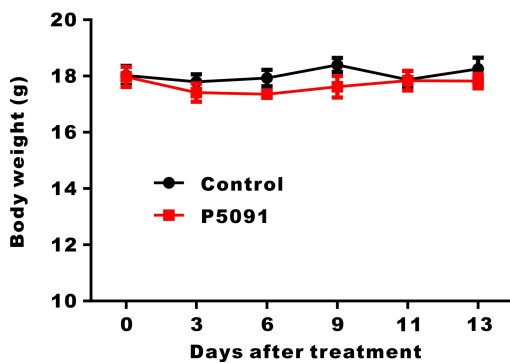

**Figure S6. Measurement of the body weight in each group.** Data are presented as the mean  $\pm$  SEM (n = 6).

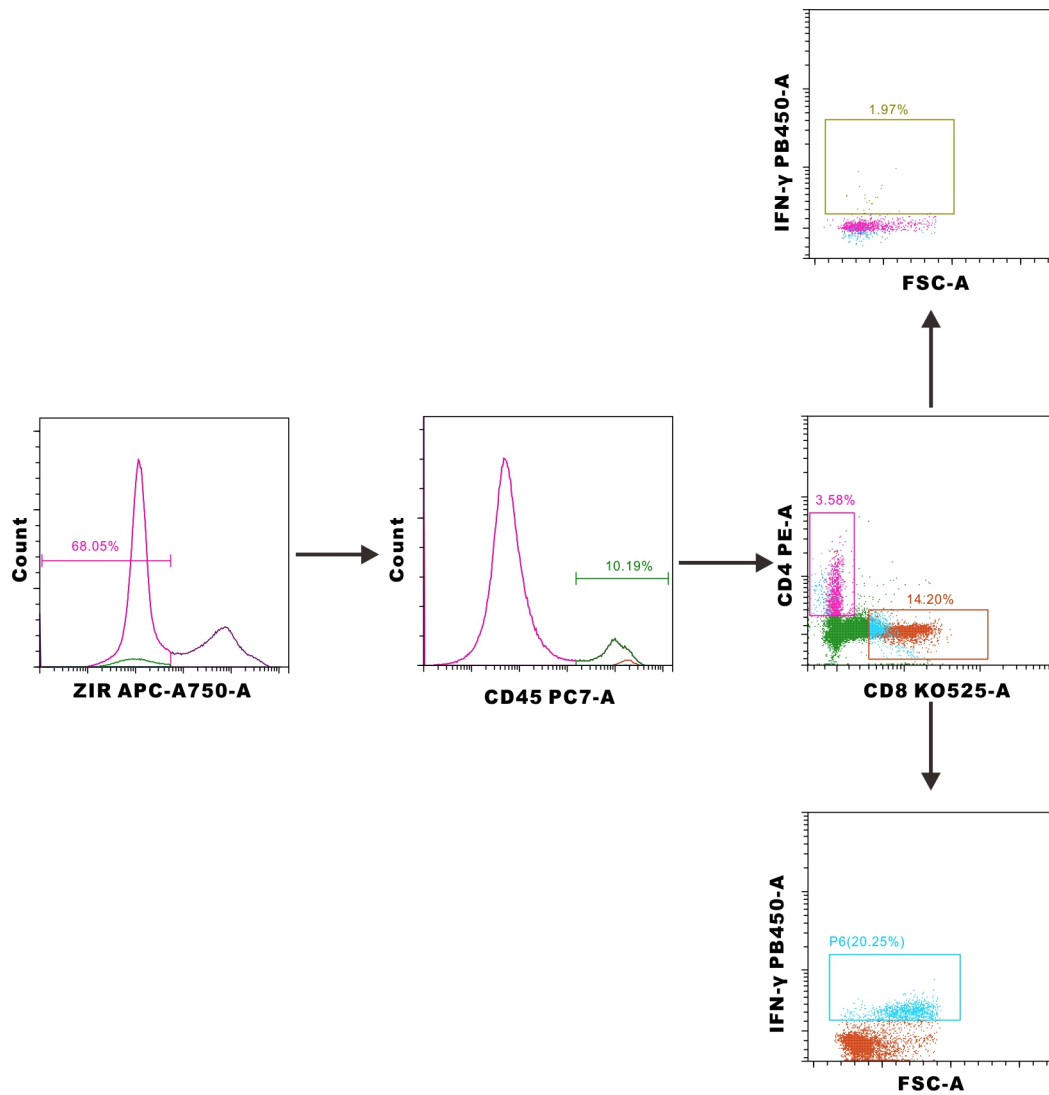

**Figure S7.** The gating strategy for the detection of Th1 cells and CTLs in TME by flow cytometry.

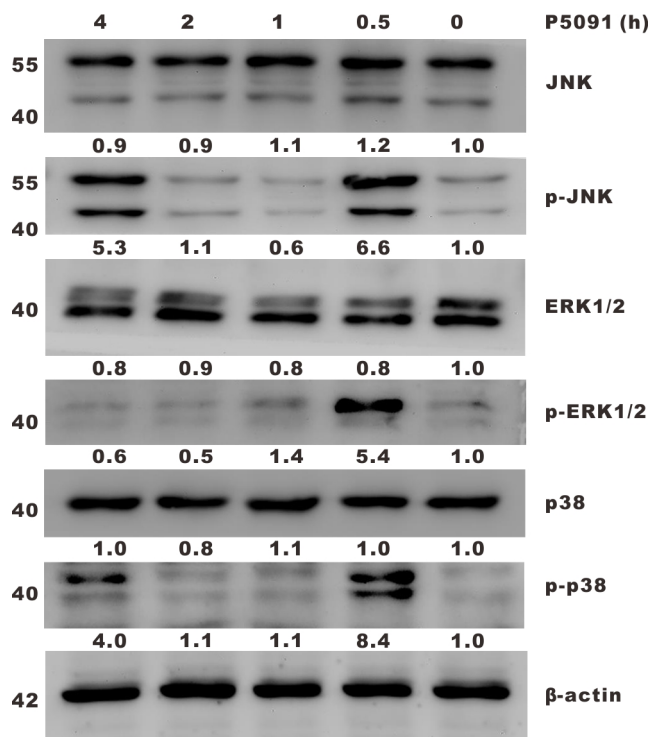

**Figure S8.** The expression of JNK, p-JNK, ERK1/2, p-ERK1/2, p38, p-p38 and  $\beta$ -actin in IL-4/13 M2 cells (IL-4/13-induced ANA-1) treated with P5091 (10  $\mu$ M) at indicated time points by western blotting.

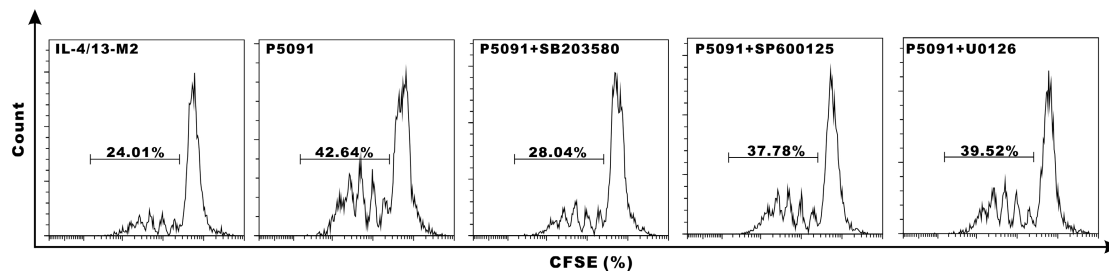

**Figure S9.** Flow cytometry analyses of CFSE expression on the CD8<sup>+</sup> T cell membrane surface after various indicated treatments.



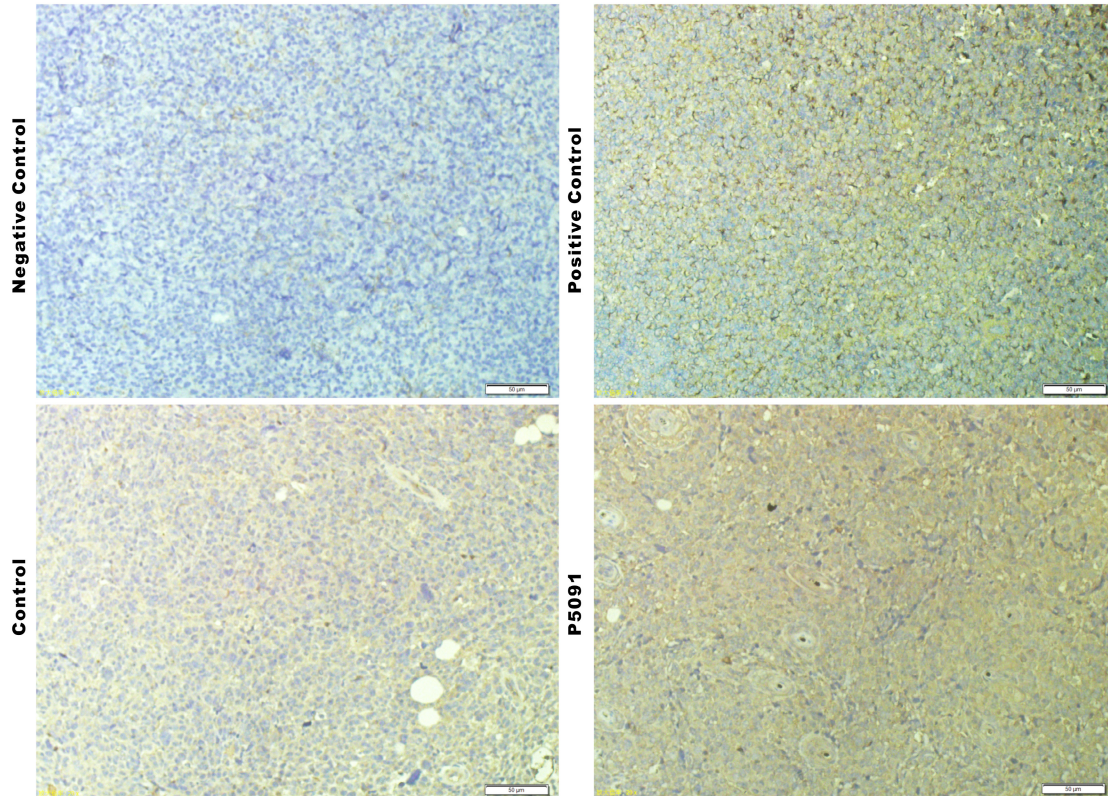

**Figure S10.** Immunohistochemical detection of PD-L1 expression in TME of P5091 and control groups.

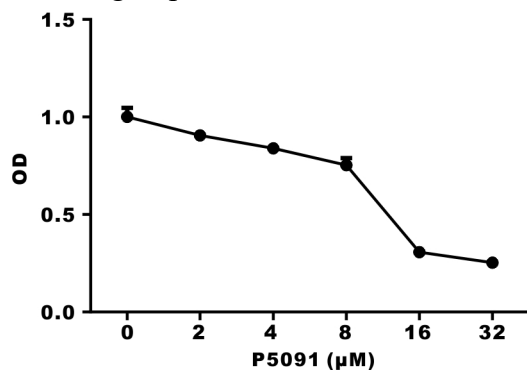

**Figure S11.** Cell viability measurement of Lewis cells treated with P5091 at indicated concentrations by CCK-8. Data are presented as the mean  $\pm$  SEM (n = 3).
